# Supplementary material for: Information Processing in Social Insect Networks
Source: PLOS journal article supplement (doi:10.1371/journal.pone.0040337), 2012-07-16
Supplement: S4 (10.1371/journal.pone.0040337.s004) [file journal.pone.0040337.s004]

# Supporting information, “Information processing in social insect colonies”

James S. Waters and Jennifer H. Fewell

## Text S3: Effect of analysis time on subgraph Z-scores

The effect of analysis time on motif representation was examined by constructing cumulative networks spanning 30-130 seconds of whole-colony interaction. These networks exhibited a considerable range in size from 83 individuals and 136 interactions in a network based on 26 seconds of recorded behavior to 129 individuals engaging in 1117 interactions in a network based on 130 seconds of recorded behavior.

The Z-score is defined as the ratio of the difference in subgraph density between an observed network and its average density in a set of 10,000 randomized networks divided by the standard deviation of the subgraph’s density in the randomized networks. Although there are visible trends in which the Z-scores associated with individual subgraphs (IDs 1-13) either increase or decrease with the amount of time analyzed (and network size), none of the linear regressions were significant (p-values ranging from 0.20-0.99), suggesting that the method of motif analysis is robust with respect to the amount of time analyzed.

The figure below shows a scatterplot of the Z-scores for each subgraph as a function of the amount of time analyzed in constructing the interaction network. The table below gives the estimates and standard error for intercept and slope as well as t-score and p-value for the slope of each of the regression models fitting subgraph Z-score as a function of the amount of time used to construct the respective networks.

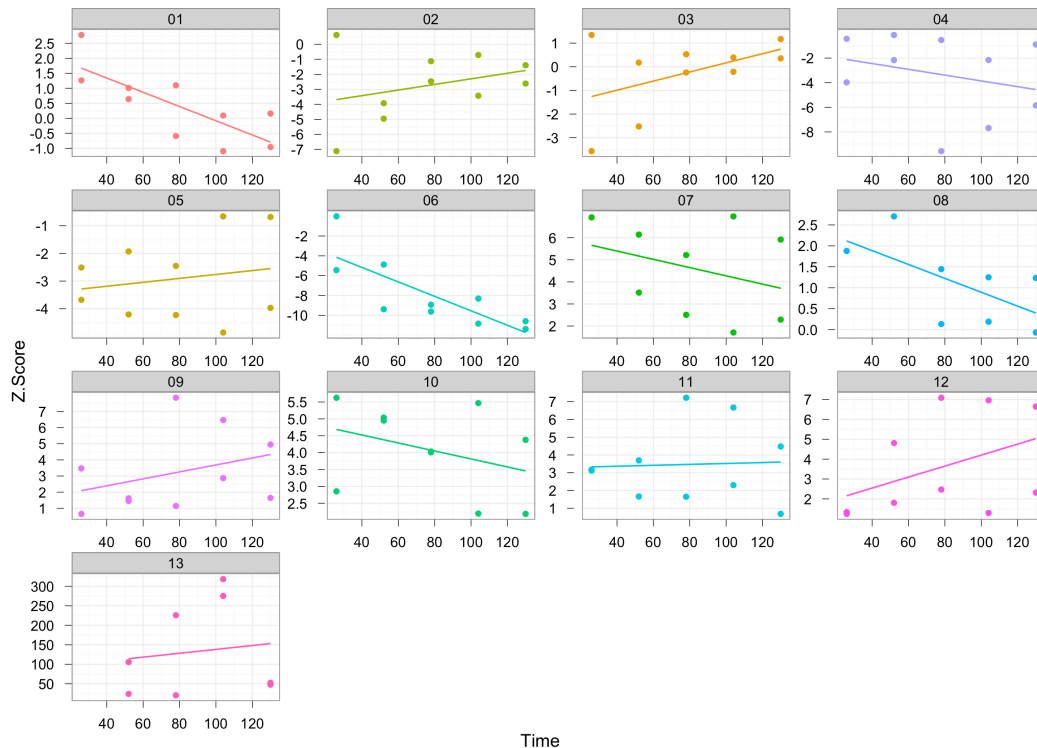

**Regression summary statistics:**

| Subgraph | Intercept       | Slope          | t      | Pr (> t ) |
|----------|-----------------|----------------|--------|-----------|
| 1        | 2.289 ± 23.685  | -0.024 ± 0.275 | -0.086 | 0.9314    |
| 2        | -6.459 ± 33.496 | 0.019 ± 0.275  | 0.068  | 0.9459    |
| 3        | -4.050 ± 33.496 | 0.019 ± 0.275  | 0.07   | 0.9442    |
| 4        | -3.791 ± 33.496 | -0.024 ± 0.275 | -0.086 | 0.932     |
| 5        | -5.758 ± 33.496 | 0.007 ± 0.275  | 0.026  | 0.9795    |
| 6        | -4.544 ± 33.496 | -0.073 ± 0.275 | -0.266 | 0.7911    |
| 7        | 3.856 ± 36.811  | -0.019 ± 0.311 | -0.06  | 0.9522    |
| 8        | 0.261 ± 39.061  | -0.017 ± 0.330 | -0.05  | 0.96      |
| 9        | -0.759 ± 33.496 | 0.022 ± 0.275  | 0.078  | 0.9376    |
| 10       | 2.7078 ± 33.496 | -0.012 ± 0.275 | -0.043 | 0.9658    |
| 11       | 0.973 ± 33.496  | 0.003 ± 0.275  | 0.009  | 0.9925    |
| 12       | -0.851 ± 33.496 | 0.028 ± 0.275  | 0.101  | 0.92      |
| 13       | 86.039 ± 44.022 | 0.499 ± 0.389  | 1.284  | 0.2022    |
