# Supplementary material for: Information Processing in Social Insect Networks
Source: PLoS One. 2012 Jul 16;7(7):e40337. doi: 10.1371/journal.pone.0040337 (PMC3398002; doi:10.1371/journal.pone.0040337)

**Supporting information, “Information processing in social insect colonies”**  
**James S. Waters and Jennifer H. Fewell**

**Text S2: Network Degree Distributions**

For each colony network, we present the histograms for in- and out-degree as well as the scatterplots associated with estimating the exponent by OLS-regression for the power-law distribution describing the in- and out-degree scaling in each colony.

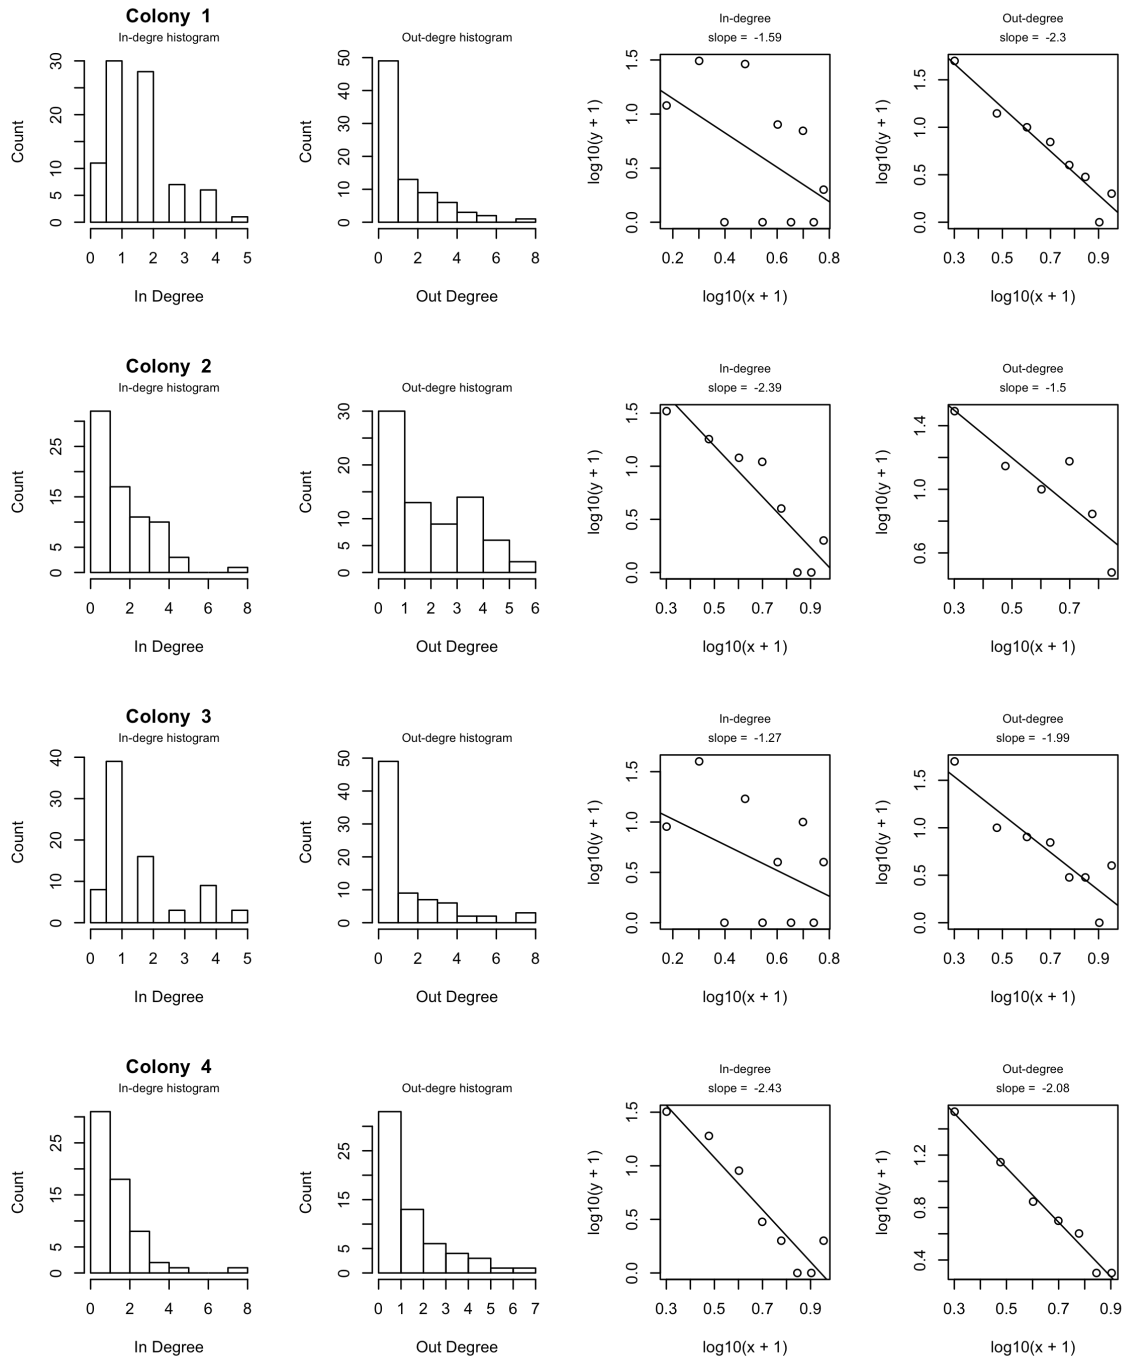

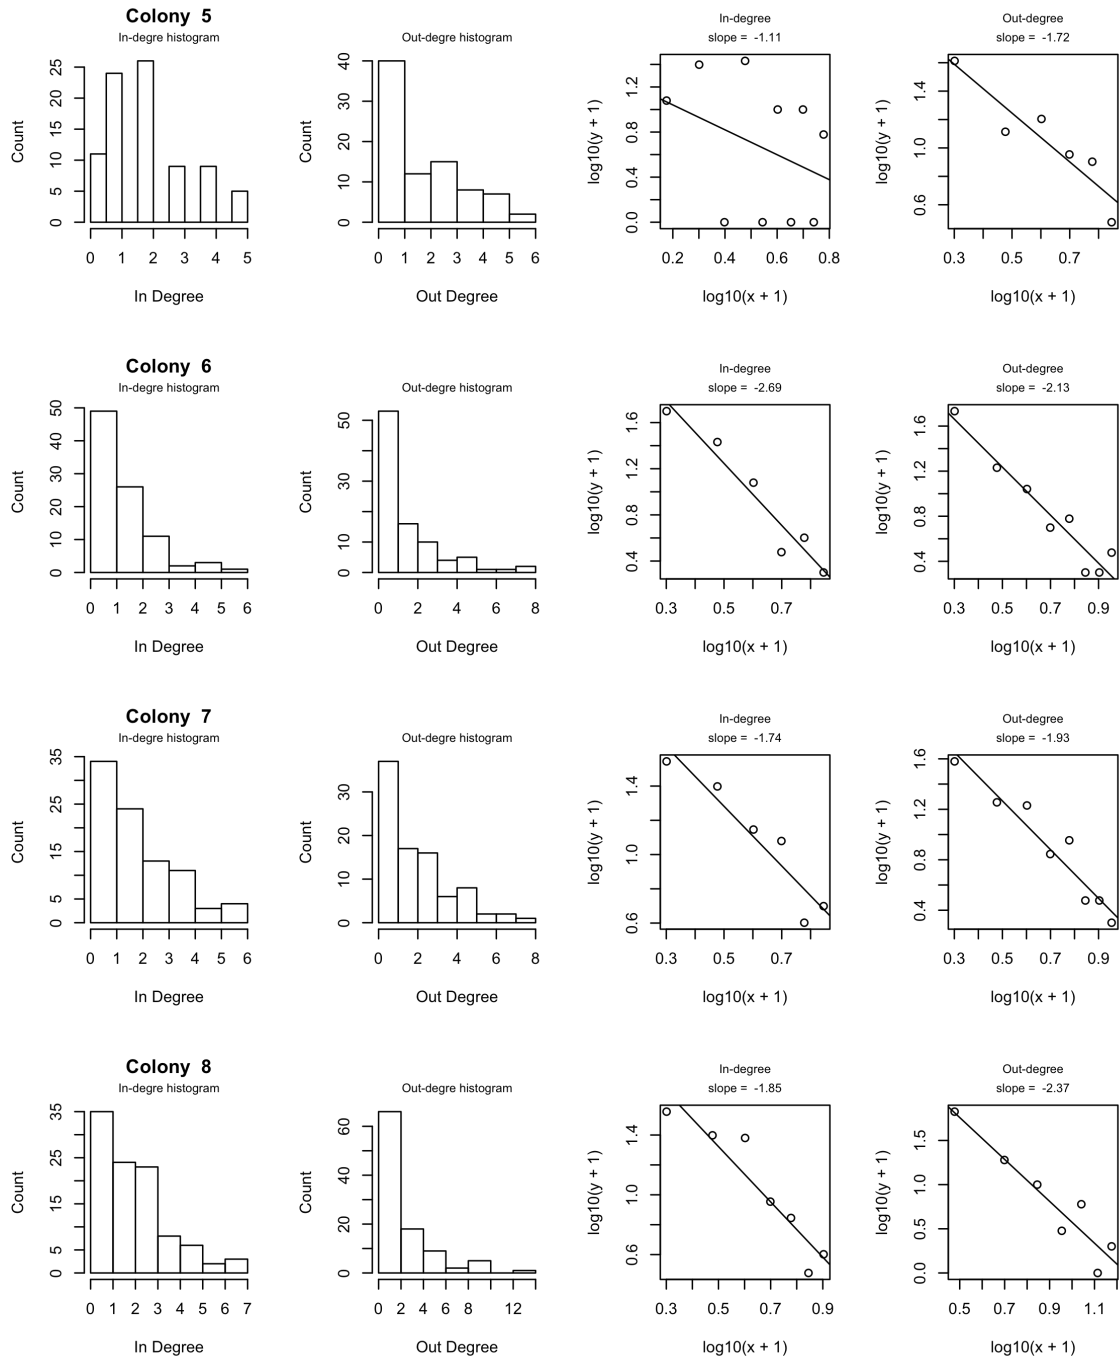

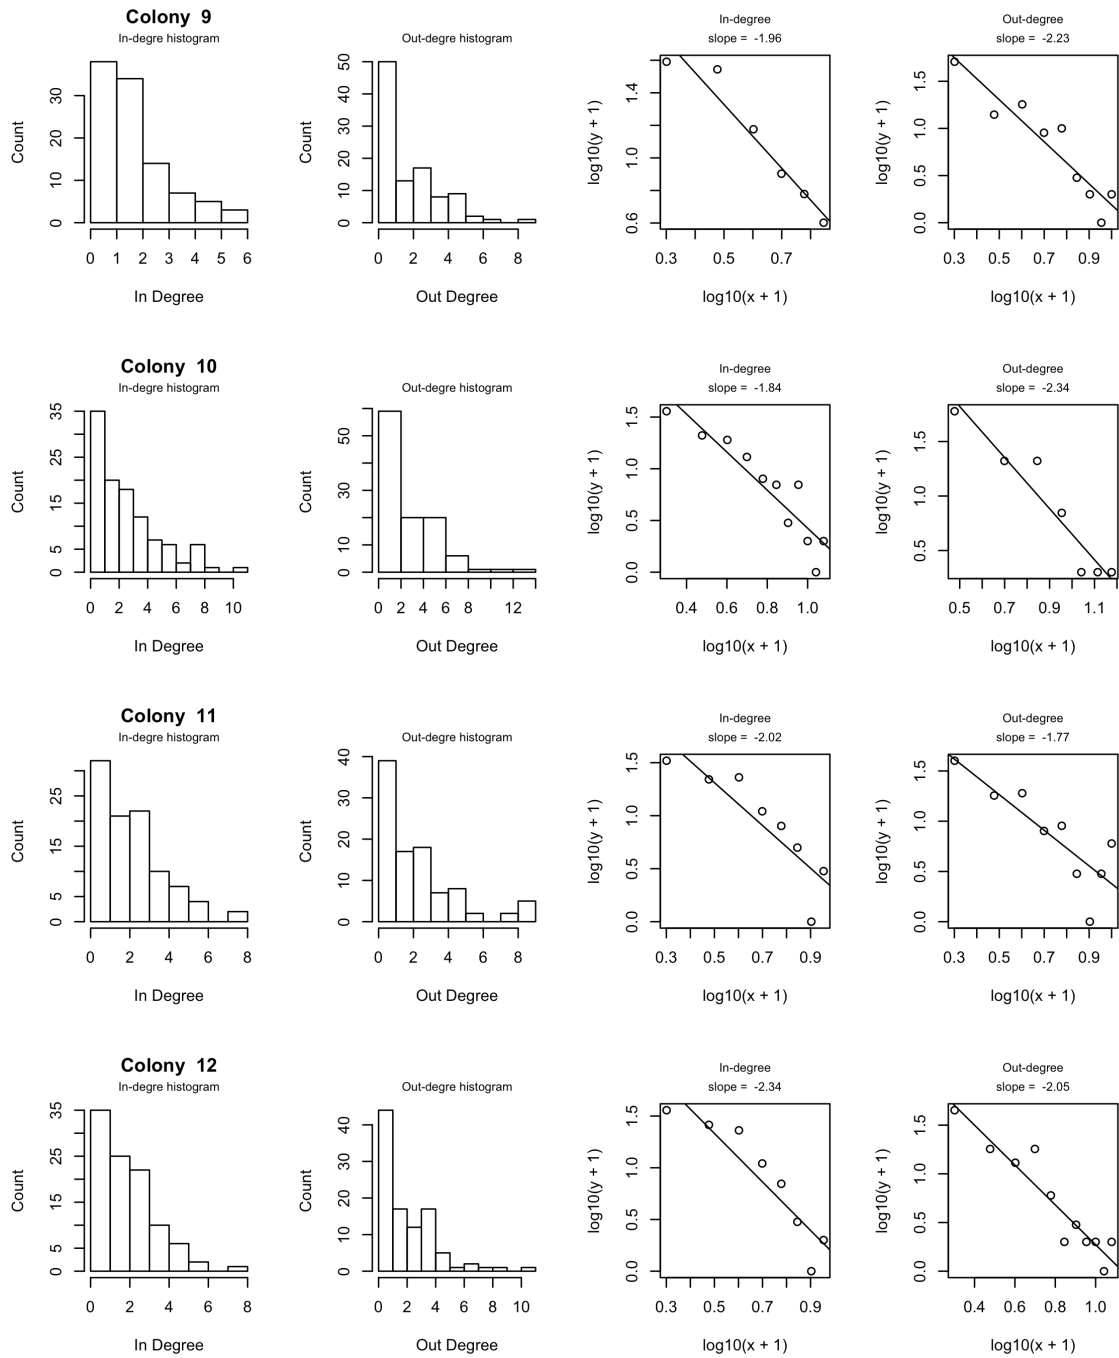

Supplement: Text S2 — Network degree distributions (PDF; 938 KB). (PDF) [file pone.0040337.s003.pdf]
